# Supplementary material for: Development of the Menu Assessment Scoring Tool (MAST) to Assess the Nutritional Quality of Food Service Menus
Source: MDPI journal article supplement (doi:10.3390/ijerph20053998), 2023-02-23
Supplement: s1 [file s1]

**Supplementary Table S1: Food business classification framework**

| <b>Food retail</b>                                                                                                                                                                                                                                                                                                                                                                                  | <b>Food service</b>                                                                                                         | <b>Charitable food provision</b>                                                                           | <b>Food production and preparation</b>                                                                                                                                                                                                                                       | <b>Institutional food</b>                                                                                                                                                                                                               | <b>Accommodation and recreation services</b>                                                                        |
|-----------------------------------------------------------------------------------------------------------------------------------------------------------------------------------------------------------------------------------------------------------------------------------------------------------------------------------------------------------------------------------------------------|-----------------------------------------------------------------------------------------------------------------------------|------------------------------------------------------------------------------------------------------------|------------------------------------------------------------------------------------------------------------------------------------------------------------------------------------------------------------------------------------------------------------------------------|-----------------------------------------------------------------------------------------------------------------------------------------------------------------------------------------------------------------------------------------|---------------------------------------------------------------------------------------------------------------------|
| <p>Supermarket</p> <p>Discount grocery store</p> <p>Other grocery store</p> <p>Convenience store</p> <p>World food/ethnic food store</p> <p>Health food store</p> <p>Butcher/poultry store</p> <p>Fishmonger</p> <p>Bakery</p> <p>Fruit and vegetable store/greengrocer</p> <p>Other specialist food retail outlet</p> <p>Liquor merchant/bottle shop</p> <p>General retail, not food or liquor</p> | <p>Caf /coffee shop</p> <p>Restaurant</p> <p>Fast casual/quick service/takeaway</p> <p>Pub/tavern/bar/winery/distillery</p> | <p>Emergency food provision - groceries</p> <p>Emergency food provision - meals</p> <p>Meals-on-wheels</p> | <p>Catering kitchens/home-based catering business/cooking classes</p> <p>Food truck/coffee or other drinks van/food market vendor</p> <p>Food home delivery service</p> <p>Food manufacturer/processor</p> <p>Packer, warehouse, food storage, food producer, wholesaler</p> | <p>Hospitals</p> <p>Residential care</p> <p>Defence</p> <p>Correctional</p> <p>Corporate (workplace)</p> <p>Education</p> <p>Childcare</p> <p>Community centre/church/hall/function centre</p> <p>Residential worksite</p> <p>Other</p> | <p>Entertainment venue</p> <p>Health and leisure venue</p> <p>Member based clubs</p> <p>Accommodation with food</p> |
